# Supplementary material for: Enantioselective aerobic oxidation of olefins by magnetite nanoparticles at room temperature: a chiral carboxylic acid strategy
Source: Royal Society of Chemistry journal article supplement (doi:10.1039/c5gc01774b), 2015-08-14
Supplement: c5gc01774b1.pdf [file c5gc01774b1.pdf]

## Supplementary Information

### Enantioselective aerobic oxidation of olefins by magnetite nanoparticles at room temperature: a chiral carboxylic acid strategy

Leila Hadian-Dehkordi and Hassan Hosseini-Monfared\*

*Department of Chemistry, University of Zanjan 45195-313, Zanjan, Islamic Republic of Iran.*  
Corresponding author. Tel.: +98 24 33052576; fax: +98 241 33583203. *E-mail address:*  
[monfared@znu.ac.ir](mailto:monfared@znu.ac.ir) (H. Hosseini-Monfared).

---

#### Content

Fig. S1 Thermal gravimetric analysis of Fe<sub>3</sub>O<sub>4</sub>/tar-NPs

Fig. S2 Histogram of the number-size-distribution for Fe<sub>3</sub>O<sub>4</sub>/tart-NPs

Fig. S3 Magnetization curve of Fe<sub>3</sub>O<sub>4</sub>/tart-NPs

Table S1 Comparison of the olefin oxidation by different catalysts

Fig. S4 Reuse of the catalyst in the aerobic oxidation of cyclohexene

Fig. S5. Comparison of the FT-IR spectra of the fresh and used Fe<sub>3</sub>O<sub>4</sub>/tart-NPs

Fig. S6 Nitrogen adsorption-desorption isotherm of the fresh Fe<sub>3</sub>O<sub>4</sub>/tart-NPs and used Fe<sub>3</sub>O<sub>4</sub>/tart-NPs after catalysis

Fig. S7 <sup>1</sup>H NMR spectrum in CDCl<sub>3</sub> of the crude product obtained upon oxidation of 1-decene.

Fig. S8 <sup>1</sup>H NMR spectrum in CDCl<sub>3</sub> of the crude product obtained upon oxidation of *trans*-stilbene .

Fig. S9 <sup>13</sup>C NMR spectrum in CDCl<sub>3</sub> of the crude product obtained upon oxidation of *trans*-stilbene

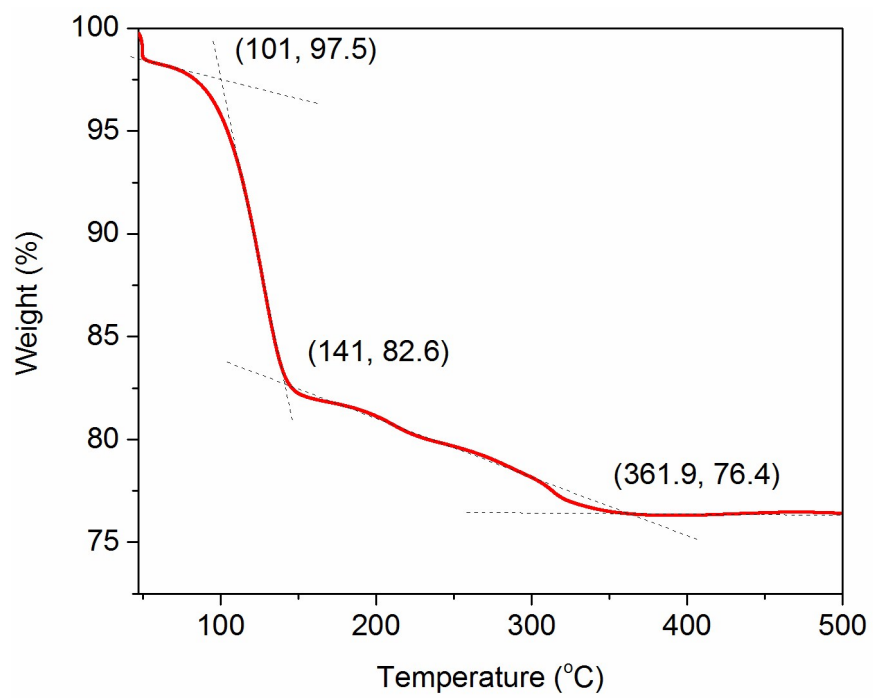

Fig. S1 Thermal gravimetric analysis of Fe<sub>3</sub>O<sub>4</sub>/tar-NPs

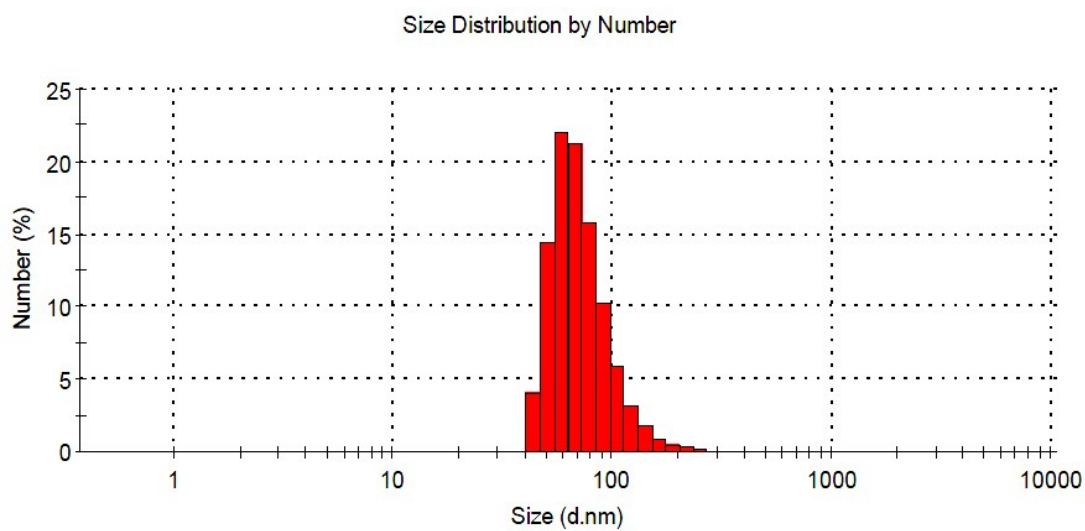

Fig. S2 Example of a histogram of the number-size-distribution for  $\text{Fe}_3\text{O}_4/\text{tart-NPs}$  from dynamic light scattering (DLS) with medium diameter (hydrodynamic diameter) of 74 nm.

The magnetic properties of the synthesized  $\text{Fe}_3\text{O}_4/\text{tart-NPs}$  were analyzed by vibrating sample magnetometry (VSM). The field-dependent magnetization curve shown in Fig. 5 indicates the magnetization as a function of applied magnetic field, measured at room temperature. The magnetization value of  $\text{Fe}_3\text{O}_4/\text{tart-NPs}$  is approximately the same with the value of  $\text{Fe}_3\text{O}_4\text{-NPs}$  and higher than the magnetization of core-shell  $\text{Fe}_3\text{O}_4/\text{SiO}_2\text{-NPs}$ .<sup>1</sup> This finding shows the negligible effect of diamagnetic tartaric acid coating over the  $\text{Fe}_3\text{O}_4\text{-NPs}$  and a favorable property for magnetic separation by a conventional magnet. The hysteresis loops of the powdered material showed no magnetic hysteresis, with both the magnetization and demagnetization curves passing through the origin, which clearly indicates the superparamagnetic nature of the material. Moreover, the synthesized heterogeneous nanocatalysts possess strong magnetic responsivity due to a high saturation magnetization value ( $55 \text{ emu g}^{-1}$ ).

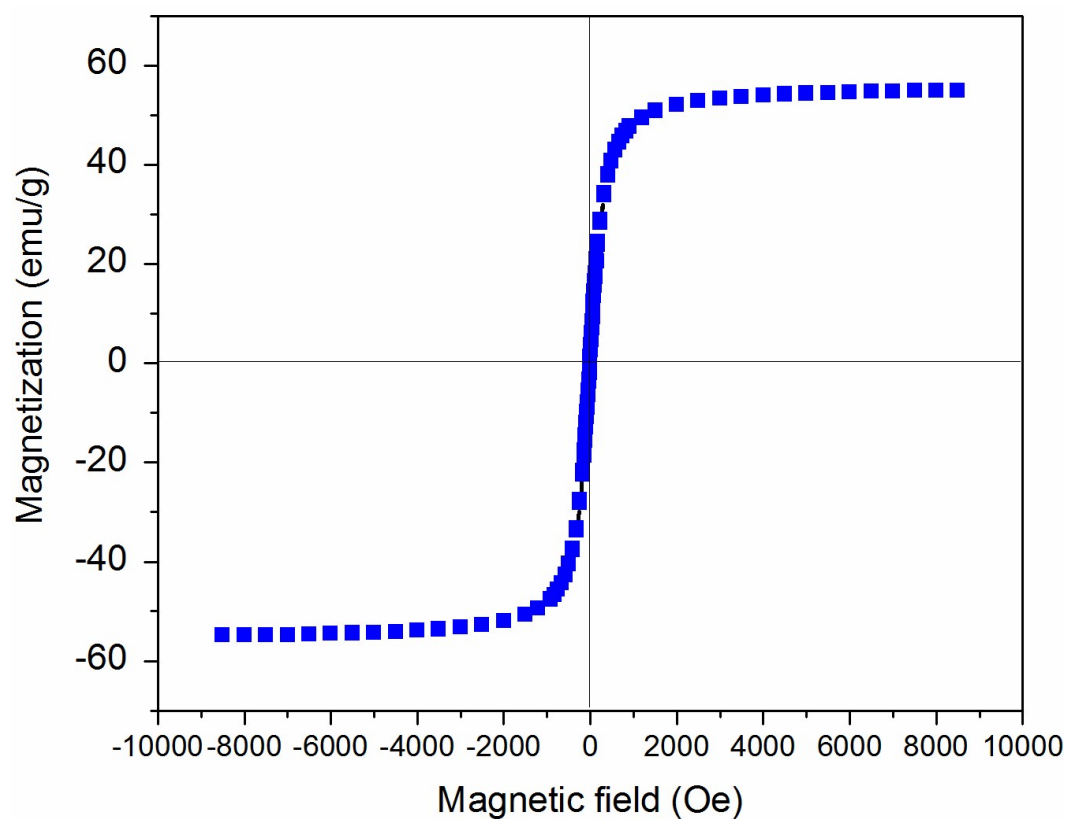

Fig. S3 Magnetization curve of  $\text{Fe}_3\text{O}_4/\text{tart-NPs}$ .

Ménage *et al.* used chiral bipyridine to construct a catalytically-active diiron complex which was effective in the epoxidation of a range of olefins in up to 63% ee (for *trans*-*b*-methylcinnamate; 35% yield) using 0.2 mol% of catalyst with peracetic acid as the oxidant.<sup>2</sup> The majority of olefins were oxidised in rather low ee (max 28%) however. The results of the oxidation of *cis*- and *trans*-stilbene by dioxygen in the presence of some homogeneous and heterogeneous iron catalysts are compared with catalyst Fe<sub>3</sub>O<sub>4</sub>/tart-NPs in Table S1. In addition to epoxide selectivity and conversion percent, the reaction conditions of room temperature, O<sub>2</sub> pressure 2 bar and reaction time of 7 h for our new catalyst Fe<sub>3</sub>O<sub>4</sub>/tart-NPs are greatly remarkable.

**Table S1** Comparison of the olefin oxidation by different catalysts <sup>a</sup>

| Entry | Catalyst                                                                                                                        | Substrate                                         | Conditions (sol, T, t, atm, additives or co-catalyst)                              | Conversion (%) | Epoxide Selectivity (%) | Ref       |
|-------|---------------------------------------------------------------------------------------------------------------------------------|---------------------------------------------------|------------------------------------------------------------------------------------|----------------|-------------------------|-----------|
| 1     | FeCl <sub>3</sub> ·6H <sub>2</sub> O                                                                                            | <i>trans</i> -stilbene<br><i>cis</i> -stilbene    | CH <sub>3</sub> CN, rt, 20 h, O <sub>2</sub> 1 atm, imidazole/ $\beta$ -keto ester | 91<br>28       | 26<br>35                | 3         |
| 3     | Fe <sup>2+</sup> -NaY                                                                                                           | <i>trans</i> -stilbene<br>$\alpha$ -methylstyrene | DMF, 100 °C, 24 h, O <sub>2</sub> 40 atm, no additive                              | 34<br>82       | 60<br>12                | 4         |
| 4     | [NMe <sub>4</sub> ] <sub>3</sub> [Fe(opba)(CO <sub>3</sub> )]·5H <sub>2</sub> O<br>(opba = <i>ortho</i> -phenylenebis(oxamato)) | <i>trans</i> -stilbene<br><i>cis</i> -stilbene    | Fluorobenzene, rt, 3 h, O <sub>2</sub> 1 atm, pivaldehyde                          | 95<br>20       | 95<br>15                | 5         |
| 5     | Fe <sub>3</sub> O <sub>4</sub> /tart-NPs                                                                                        | <i>trans</i> -stilbene<br><i>cis</i> -stilbene    | CH <sub>3</sub> CN, 25 °C, 7 h, O <sub>2</sub> atm, isobutyraldehyde               | 100<br>100     | 56<br>92                | This work |

<sup>a</sup> S = substrate; sol = solvent; T = temperature; t = time; atm = gas atmosphere.

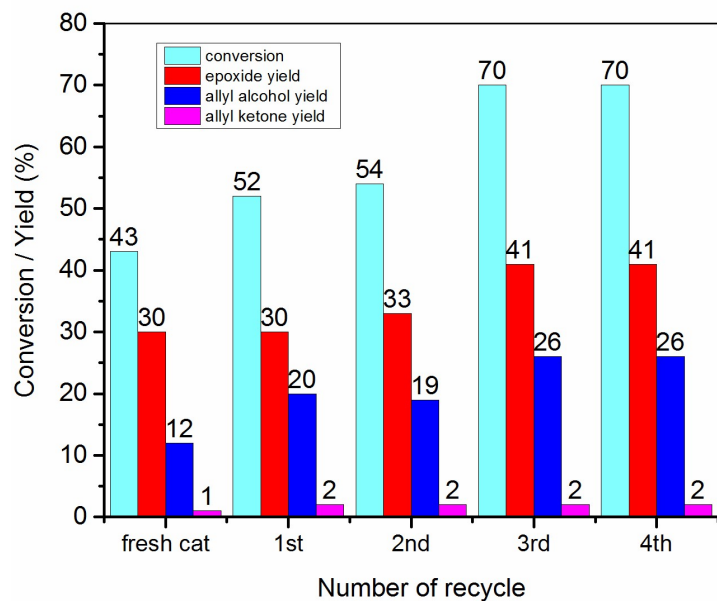

Fig. S4 Reuse of the catalyst in the aerobic oxidation of cyclohexene.

Conditions: catalyst  $\text{Fe}_3\text{O}_4/\text{tart-NPs}$  1.0 mg, isobutyraldehyde 5 mmol, substrate 2 mmol,  $\text{CH}_3\text{CN}$  3 ml, chlorobenzene 0.1 g, oxygen 2 bar, time 7 h at 25 °C.

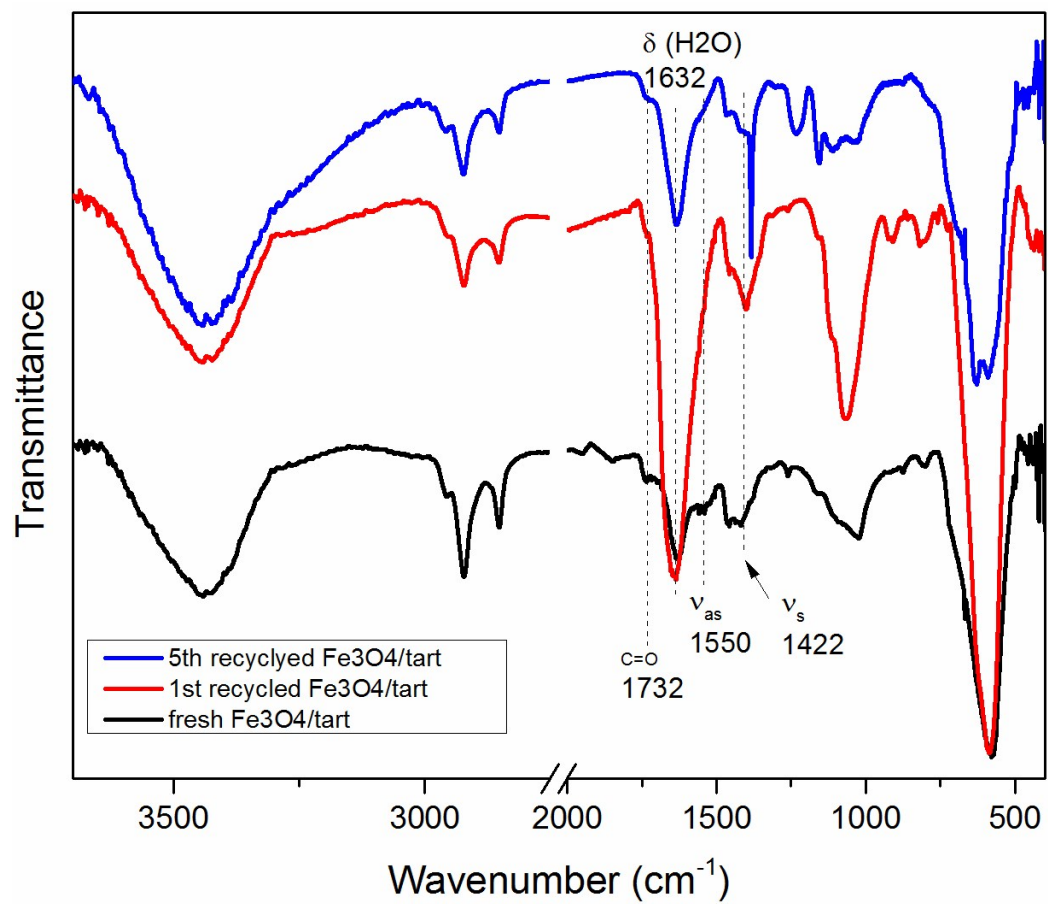

Fig. S5. Comparison of the FT-IR spectra of the fresh and used  $\text{Fe}_3\text{O}_4/\text{tart}$ -NPs

The textural properties of fresh Fe<sub>3</sub>O<sub>4</sub>/tart-NPs and used Fe<sub>3</sub>O<sub>4</sub>/tart-NPs were monitored by N<sub>2</sub> adsorption–desorption analysis and the structural parameters for these materials are presented in Table S2. The used catalyst shows an increase in its specific surface area and pore volume (Fig. S6). The surface area of the used catalyst Fe<sub>3</sub>O<sub>4</sub>/tart-NPs increased from 85.454 m<sup>2</sup> g<sup>-1</sup> to 107.580 m<sup>2</sup> g<sup>-1</sup> after two times recycle.

Table S2 Textural properties of fresh Fe<sub>3</sub>O<sub>4</sub>/tart-NPs and used Fe<sub>3</sub>O<sub>4</sub>/tart-NPs.

| Catalyst                                       | Surface area<br>(m <sup>2</sup> g <sup>-1</sup> ) | Pore volume<br>(cm <sup>3</sup> g <sup>-1</sup> ) | Pore diameter<br>(nm) |
|------------------------------------------------|---------------------------------------------------|---------------------------------------------------|-----------------------|
| Fresh Fe <sub>3</sub> O <sub>4</sub> /tart-NPs | 85                                                | 0.19                                              | 8.77                  |
| Used Fe <sub>3</sub> O <sub>4</sub> /tart-NPs  | 108                                               | 0.19                                              | 7.06                  |

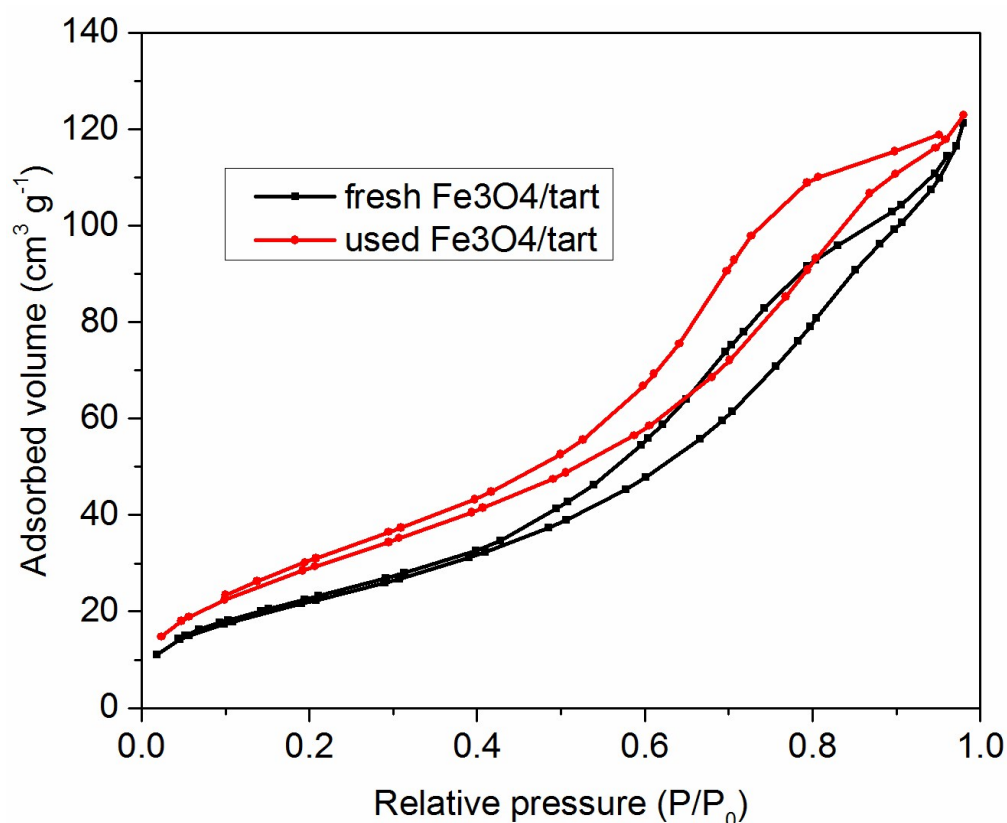

Fig. S6 Nitrogen adsorption-desorption isotherm of the fresh Fe<sub>3</sub>O<sub>4</sub>/tart-NPs and used Fe<sub>3</sub>O<sub>4</sub>/tart-NPs after catalysis



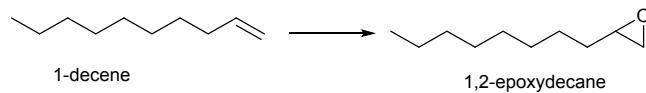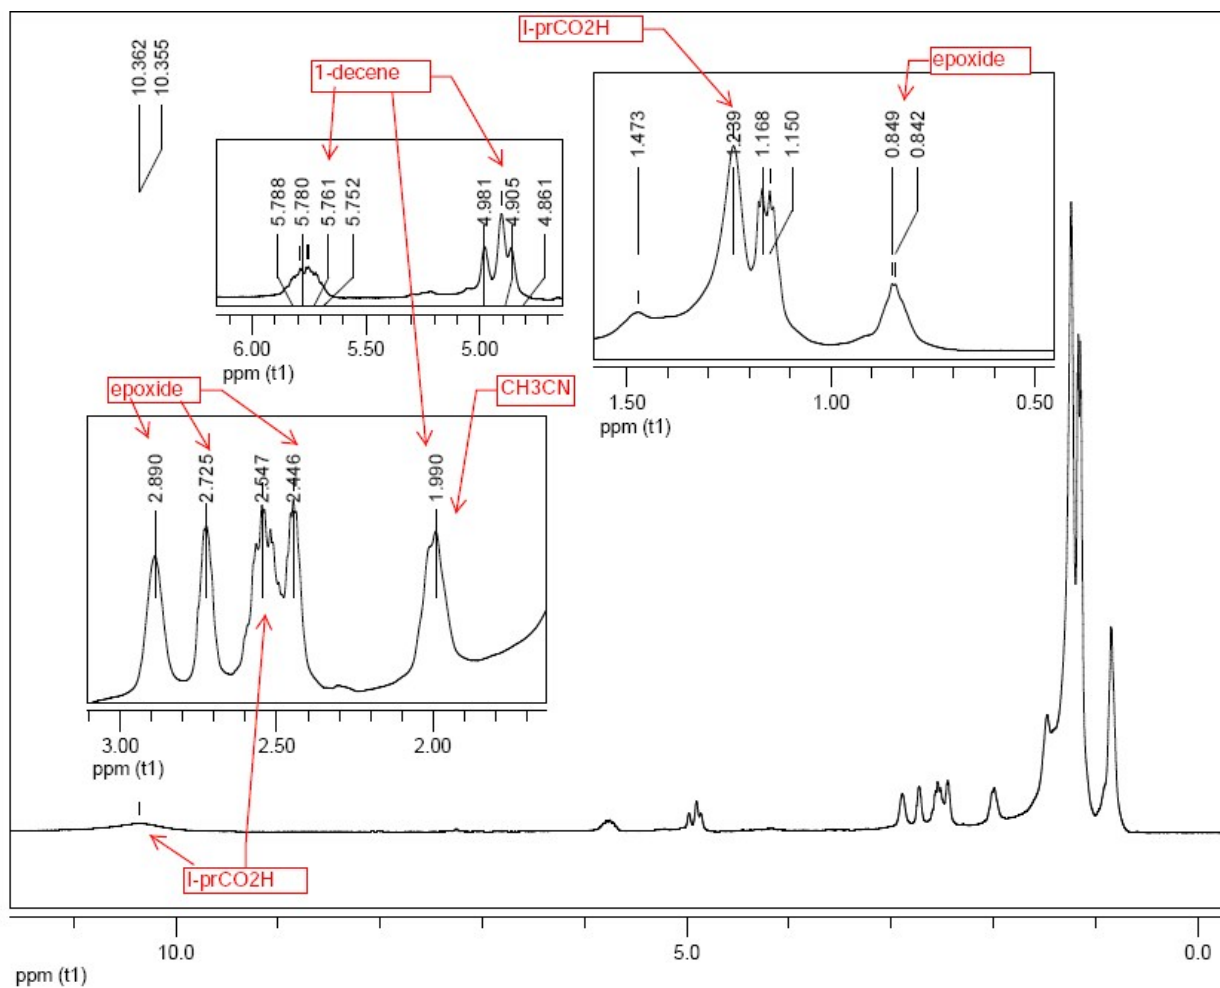

**Fig. S7**  $^1\text{H}$  NMR spectrum in  $\text{CDCl}_3$  of the crude product obtained upon oxidation of 1-decene provided 77% conversion with 1,2-epoxydecane 77%.

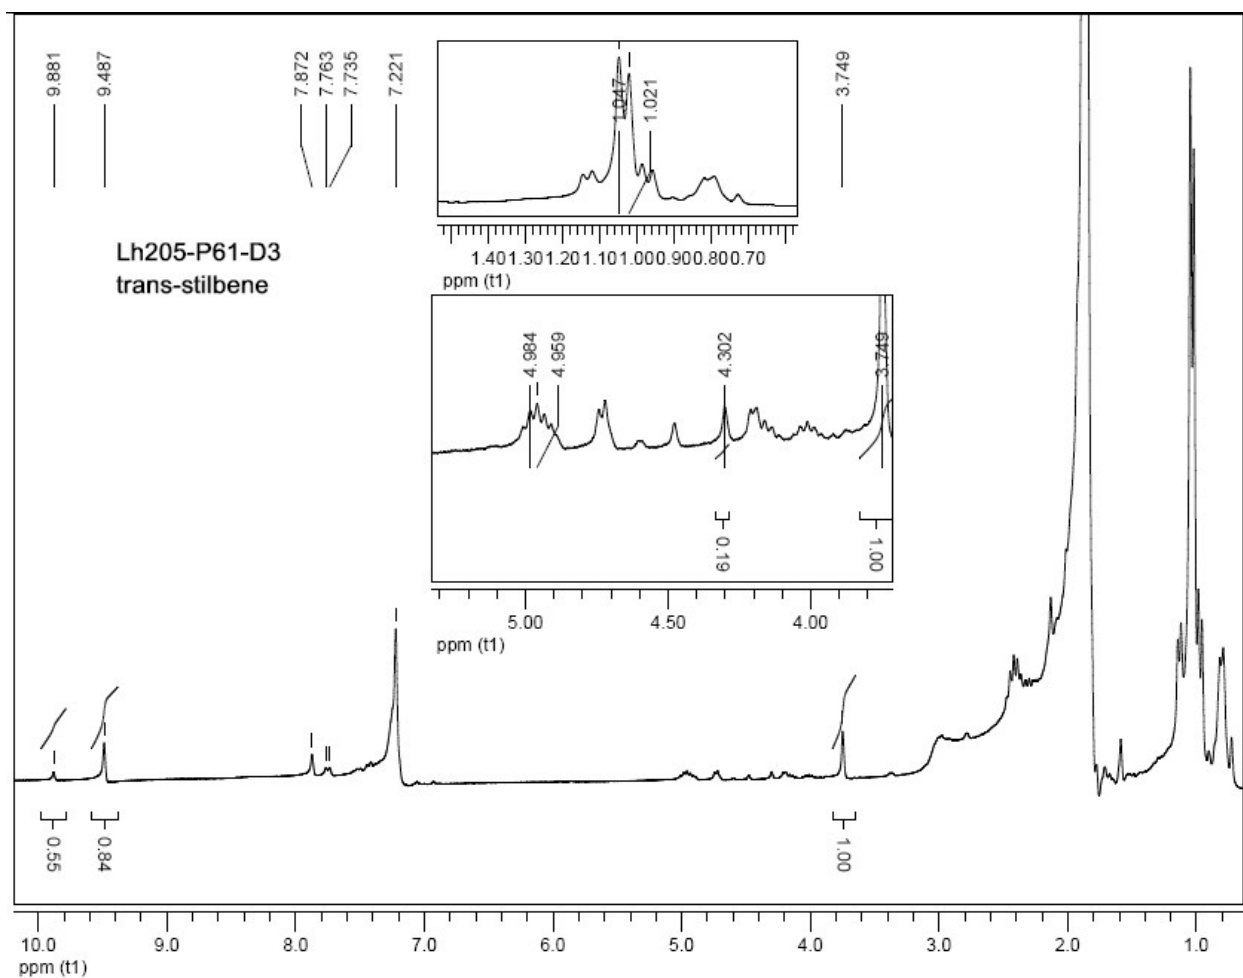

Fig. S8  $^1\text{H}$  NMR spectrum in  $\text{CDCl}_3$  of the crude product obtained upon oxidation of trans-stilbene provided 100% conversion with trans-stilbene oxide 48%, cis-stilbene oxide 8% and benzaldehyde 44%.

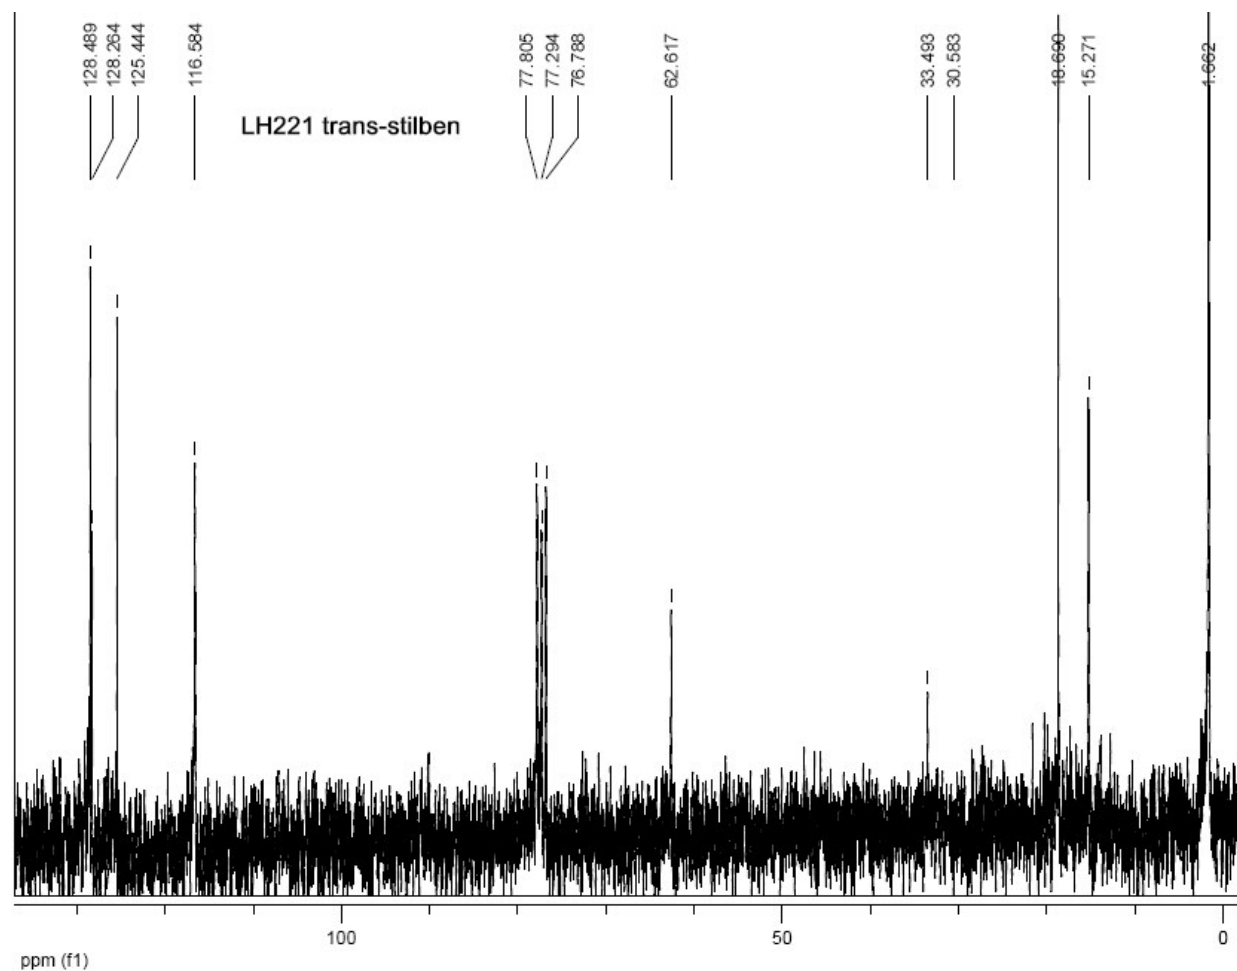

Fig. S9  $^{13}\text{C}$  NMR spectrum in  $\text{CDCl}_3$  of the crude product obtained upon oxidation of *trans*-stilbene

- 1 S. Sadighian, K. Rostamizadeh, H. Hosseini-Monfared and M. Hamidi, *Colloids Surf., B*, 2014, **117**, 406.
- 2 C. Marchi-Delapierre, A. Jorge-Robin, A. Thibon and S. Ménage, *Chem. Commun.*, 2007, 1166.
- 3 K. Schröder, B. Join, A. J. Amali, K. Junge, X. Ribas, M. Costas and M. Beller, *Angew. Chem. Int. Ed.*, 2011, **50**, 1425.
- 4 J. Liang, Q. Zhang, H. Wu, G. Meng, Q. Tang and Y. Wang, *Catal. Commun.*, 2005, **5**, 665.
- 5 R. Ruiz, M. Triannidis, A. Aukauloo, Y. Journaux, I. Fernandez, J. R. Pedro, B. Cervera, I. Castro and M. C. Munoz, *Chem. Commun.*, 1997, 2283.
